# Supplementary material for: Transition-metal-free nucleophilic 211At-astatination of spirocyclic aryliodonium ylides
Source: Royal Society of Chemistry journal article supplement (doi:10.1039/d1ob00789k), 2021-01-01
Supplement: d1ob00789k1.pdf [file d1ob00789k1.pdf]

## ***Supporting Information***

### **Transition-metal-free Nucleophilic $^{211}\text{At}$ -astatination of Spirocyclic Aryliodonium Ylides**

Keitaro Matsuoka,<sup>a</sup> Honoka Obata,<sup>a,b</sup> Kotaro Nagatsu,<sup>b</sup> Masahiro Kojima,<sup>a</sup>  
Tatsuhiko Yoshino,<sup>\*a</sup> Mikako Ogawa,<sup>\*a,c</sup> and Shigeki Matsunaga<sup>\*a,c</sup>

<sup>a</sup>*Faculty of Pharmaceutical Sciences, Hokkaido University, Sapporo, 060-0812, Japan.*

<sup>b</sup>*Department of Advanced Nuclear Medicine Sciences, Institute for Quantum Medical Science, National Institutes for Quantum and Radiological Science and Technology, Chiba, 263-8555, Japan.*

<sup>c</sup>*Global Station for Biosurfaces and Drug Discovery, Hokkaido University, Sapporo, 060-0812, Japan.*

Contact SM and TY, Phone: +81-11-706-3236 / Fax: +81-11-706-4981

Email: smatsuna@pharm.hokudai.ac.jp; tyoshino@pharm.hokudai.ac.jp

Contact MO, Phone/Fax: +81-11-706-3767, Email: mogawa@pharm.hokudai.ac.jp

|                                                                                         |    |
|-----------------------------------------------------------------------------------------|----|
| 1. General information.....                                                             | 2  |
| 2. Confirmation of the identity of $^{211}\text{At}$ -labeled compounds.....            | 3  |
| 3. $^{211}\text{At}$ -astatination of aryliodonium ylide with $^{211}\text{At}^-$ ..... | 5  |
| 4. $^{211}\text{At}$ -astatination of indolyliodonium ylide.....                        | 20 |
| 5. $^{211}\text{At}$ -astatination of benzofuryliodonium ylide.....                     | 23 |
| 6. Supplementary references .....                                                       | 26 |

## 1. General information

**Materials:** Commercially available *N,N*-dimethylformamide (KANTO CHEMICAL CO., INC, Super Dehydrated grade) were used without further manipulation unless otherwise stated. Aryliodonium ylides **1** were synthesized according to the literature.<sup>[1,2]</sup> Astatine-211 was produced from an elemental Bi target via the  $^{209}\text{Bi}(\alpha,2n)^{211}\text{At}$  nuclear reaction with a 34 MeV alpha beam for 3–4 h at a beam current of 12–13  $\mu\text{A}$  using the NIRS-QST isochronous cyclotron AVF-930 in National Institutes for Quantum & Radiological Science & Technology (QST), Chiba, Japan.  $^{211}\text{At}$  was recovered from the irradiated target in chloroform by using a previously described dry distillation procedure.<sup>[3]</sup> All other reagents were commercially available and used as received unless otherwise noted.

**Analysis:** Radioactivity was quantified using a dose curiemeter IGC-7R, Aloka. Reversed-phase high-performance liquid chromatography (HPLC) was performed on a JASCO LC-2000Plus series PU-2089i gradient pump equipped with a JASCO UV-2075 UV detector and a Universal Giken US-3000 radiation detector. Thin layer chromatography (TLC) was carried out on Merck KGaA F<sub>254</sub> plates and analyzed on a M&S Instruments Marita Star detector with GINA Star TLC Software.

## 2. Confirmation of the identity of $^{211}\text{At}$ -labeled compounds

### Synthesis of an authentic sample **2a** via electrophilic astatodestannylation of arylstannane **S1**

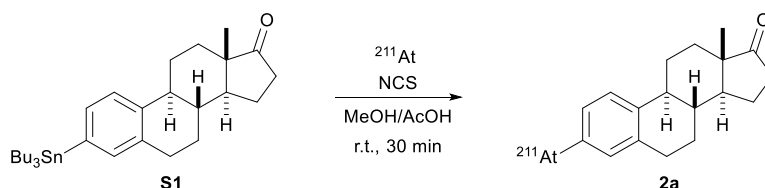

To a V-shaped glass vial was added a solution of  $^{211}\text{At}$  (8.9 MBq) in  $\text{CHCl}_3$ , and then the solvent was evaporated with the gentle flow of  $\text{N}_2$  gas at  $100\text{ }^\circ\text{C}$ . Subsequently, a solution of arylstannane **S1**<sup>[4]</sup> (2 mg) in MeOH/AcOH = 1000:1 (50  $\mu\text{L}$ ) and a solution of NCS (4 mg) in MeOH (10  $\mu\text{L}$ ) were added to the residue. After the reaction at room temperature for 15 min, the reaction mixture was analyzed by radio-HPLC.

### The reaction of arylodonium ylide **1a** with $^{211}\text{At}^-$

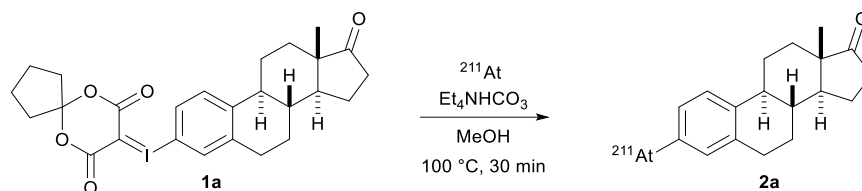

To a V-shaped glass vial was added a solution of  $^{211}\text{At}$  (52 MBq) in  $\text{CHCl}_3$ , and then the solvent was evaporated with the gentle flow of  $\text{N}_2$  gas at  $100\text{ }^\circ\text{C}$ . The residue was dissolved in MeOH (30  $\mu\text{L}$ ), followed by the addition of a mixture of arylodonium ylide **1a** (2 mg) and  $\text{Et}_4\text{NHCO}_3$  (7 mg) in MeOH (70  $\mu\text{L}$ ), which is not fully optimized reaction conditions. After the reaction at  $100\text{ }^\circ\text{C}$  for 30 min, the reaction mixture was analyzed by radio-HPLC.

### HPLC conditions and chromatograms

HPLC analysis was performed on InertSustain C18 (150 $\times$ 4.6 mm, 5  $\mu\text{m}$ ) column with flow rate at 1.0 mL/min using 30%  $\text{H}_2\text{O}$  (0.1%  $\text{HCOOH}$ )/70% MeCN eluent. The injected sample initially passed through the UV detector, followed by the radiation detector, which cause a slight delay between the corresponding UV and radiation peaks. For each analysis, a corresponding non-radioactive I-labeled compound was used as a UV reference. Due to the chemical similarities of iodine and astatine, the difference of retention time between the I-labeled compound and the  $^{211}\text{At}$ -labeled compound would be small. The resulting HPLC chromatograms were shown in below (Figure S1).

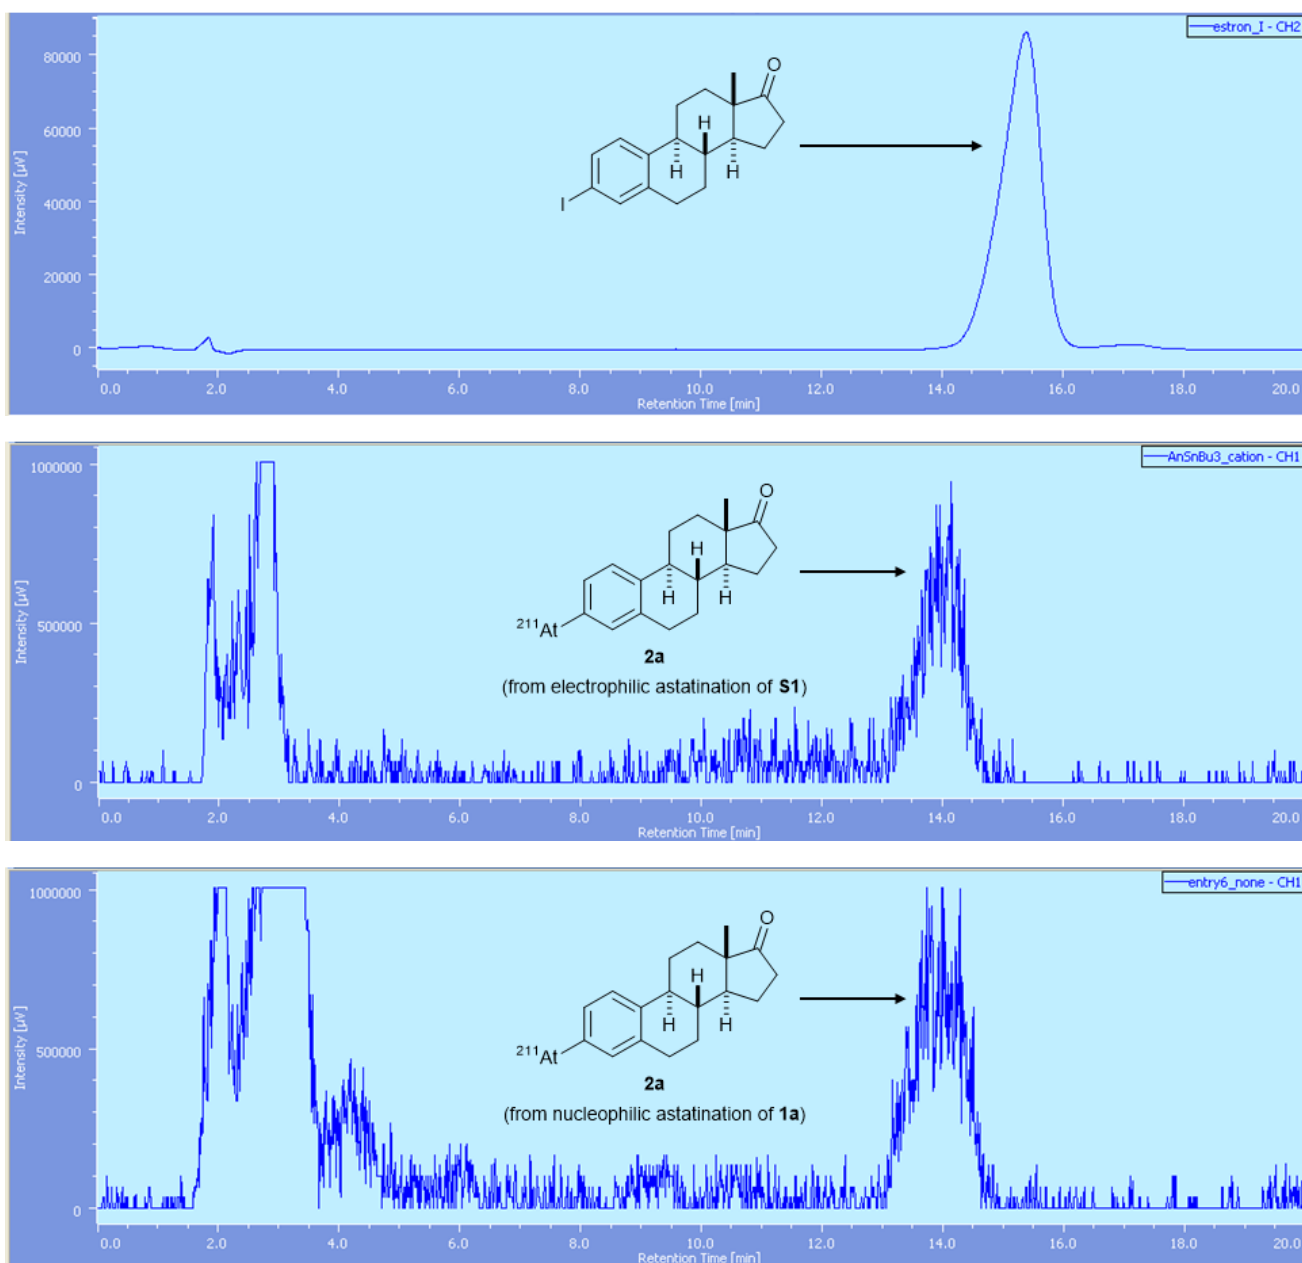

**Figure S1.** UV-HPLC chromatogram of I-labeled standard (top), radio-HPLC chromatogram of the electrophilic astatination of **S1** (middle), radio-HPLC chromatogram of the nucleophilic astatination of **1a** (bottom)

In the radio-HPLC chromatogram of each reaction, the same radiation peaks were observed at 13.0 to 15.0 min, respectively. In the adjacent to these radiation peaks, the UV peak of I-labeled standard was observed at 14.0 to 16.0 min. These results indicate that these radiation peaks at 13.0 min to 15.0 min would be  $^{211}\text{At}$ -labeled compound **2a**. Therefore, we have concluded that the reaction of arylodonium ylide **1a** with  $^{211}\text{At}^-$  would afford  $^{211}\text{At}$ -labeled compound **2a**.

### 3. $^{211}\text{At}$ -astatination of arylodonium ylide with $^{211}\text{At}^-$

#### General procedure for $^{211}\text{At}$ -astatination of arylodonium ylide

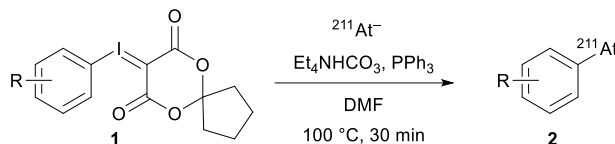

To a V-shaped glass vial was added a solution of  $^{211}\text{At}$  (16-43 MBq) in  $\text{CHCl}_3$ , followed by removal of the solvent at  $100\text{ }^\circ\text{C}$  with the gentle flow of  $\text{N}_2$  gas. Then, a solution of arylodonium ylide **1** (10 mg) in DMF (300  $\mu\text{L}$ ), a solution of  $\text{Et}_4\text{NHCO}_3$  (7 mg) in DMF (100  $\mu\text{L}$ ), and a solution of  $\text{PPh}_3$  (5 mg) in DMF (100  $\mu\text{L}$ ) were successively added to the residue. After the reaction at  $100\text{ }^\circ\text{C}$  for 30 min under nitrogen atmosphere, the reaction mixture was directly analyzed by radio-HPLC and radio-thin-layer chromatography.

#### General methods for analysis of $^{211}\text{At}$ -astatination reactions

The identity of  $^{211}\text{At}$ -labeled compound **2** was confirmed by radio-HPLC. Reversed-phase HPLC analysis was performed on InertSustain C18 (150 $\times$ 4.6 mm, 5  $\mu\text{m}$ ) column with flow rate at 1.0 mL/min using  $\text{H}_2\text{O}$  (0.1%  $\text{HCOOH}$ )/ $\text{MeCN}$  eluent. The eluent was changed in response to the product polarity. The injected sample initially passed through the UV detector, followed by the radiation detector, which cause a slight delay between the corresponding UV and radiation peaks.

In the HPLC analysis, the adsorption of unlabeled  $^{211}\text{At}^-$  on the column has often become a problem for the calculation of radiochemical yields (RCYs).<sup>[5]</sup> Furthermore, insufficient sensitivity of our radiation detector led to an insufficient signal-noise ratio of the analysis. For these reasons, RCYs were calculated as peak area of compound **2**/total $\times$ 100% on radio-TLC analysis. The decay of radioactivity during the reaction has not been considered for the calculation of RCYs since the reaction time was only 30 minutes, which was enough short compared with the half-life of  $^{211}\text{At}$  (7.2 h). Appropriate solvent conditions were determined to separate the free  $^{211}\text{At}^-$  ( $R_f = 0.00$ -0.25) from the target radiolabeled compounds **2**. For each analysis, corresponding non-radioactive I-labeled compound was used as references due to the chemical similarities of iodine and astatine.

**(8*R*,9*S*,13*S*,14*S*)-3-[<sup>211</sup>At]astato-13-methyl-6,7,8,9,11,12,13,14,15,16-decahydro-17*H*-cyclopenta[*a*]phenanthren-17-one (2a)**

According to the general procedure, the reaction of 8-(((8*R*,9*S*,13*S*,14*S*)-13-methyl-17-oxo-7,8,9,11,12,13,14,15,16,17-decahydro-6*H*-cyclopenta[*a*]phenanthren-3-yl)-λ<sup>3</sup>-iodanylidene)-6,10-dioxaspiro[4.5]decane-7,9-dione **1a** with <sup>211</sup>At<sup>-</sup> (43 MBq) afforded **2a** in 58% RCY.

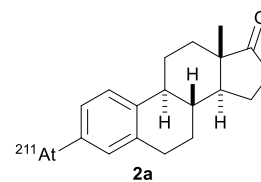

Radio-TLC chromatography

Development solvent: hexane/ethyl acetate = 5:1

Retention factor of the corresponding non-radioactive I-labeled compound: 0.35

Retention factor of <sup>211</sup>At-labeled **2a**: 0.31

The trace amount of the least polar material (R<sub>f</sub> = 0.55 highlighted in blue) is an unidentified byproduct.

Radio-HPLC chromatography

Eluent: 30% H<sub>2</sub>O (0.1% HCOOH)/70% MeCN

Retention time of the corresponding non-radioactive I-labeled compound: 14.0-16.0 min

Retention time of radioactive <sup>211</sup>At-labeled **2a**: 13.0-15.0 min

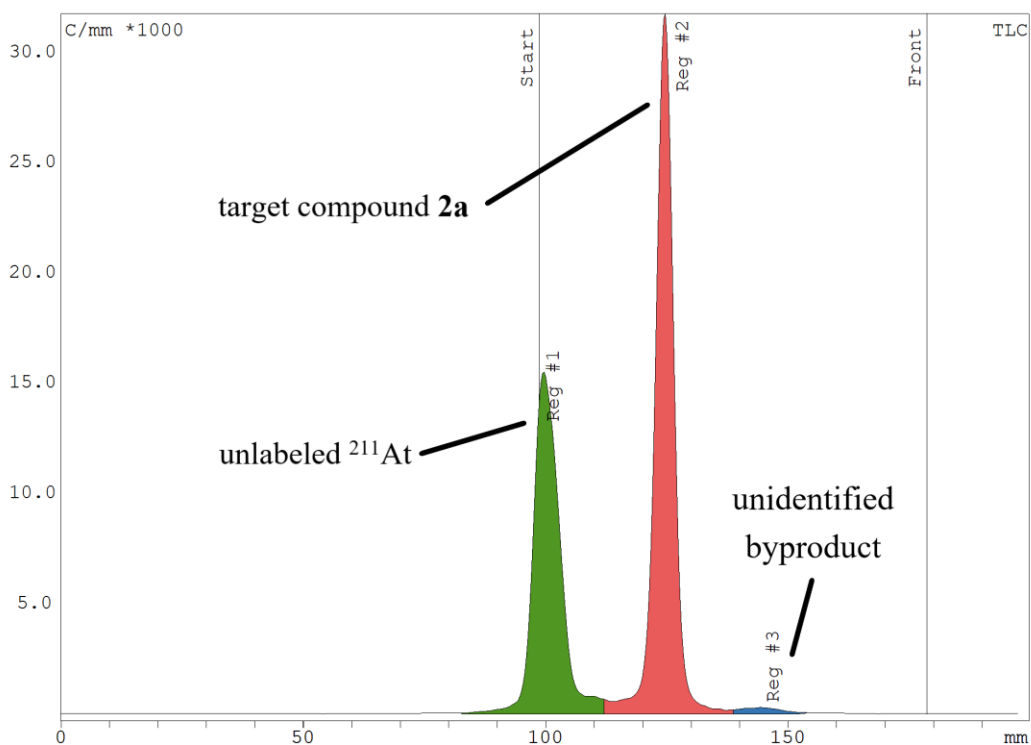

Measurement: 20201027-1.rta, started: 2020/10/27 15:30  
 Method: Hokudai from: 2000/01/01  
 Origin: 100 mm Front 180 mm  
 Meas. time: 1.0 min Resolution: 0.3 mm

km07144 positive  
 Radio detector: raytest Ramona-92 Serial Nr.: 0

| TLC        |        |        |      |          |       |
|------------|--------|--------|------|----------|-------|
| Substance  | R/F    | %Total | Type | Area     | %Area |
|            |        | %      |      | Counts   | %     |
| Reg #1     | -0.004 | 40.40  | DD   | 99878.0  | 40.79 |
| Reg #2     | 0.308  | 57.49  | DD   | 142106.0 | 58.04 |
| Reg #3     | 0.550  | 1.15   | DD   | 2855.0   | 1.17  |
| Sum in ROI |        |        |      | 244839.0 |       |
| Total area |        |        |      | 247195.0 |       |
| Area RF    |        |        |      | 201859.0 |       |

**Figure S2.** The result of radio-TLC analysis in the crude mixture of **2a**

**ethyl 2-[<sup>211</sup>At](4-astatophenoxy)-2-methylpropanoate (2b)**

According to the general procedure, the reaction of ethyl 2-(4-((7,9-dioxo-6,10-dioxaspiro[4.5]decan-8-ylidene)-λ<sup>3</sup>-iodanyl)phenoxy)-2-methylpropanoate **1b** with <sup>211</sup>At<sup>-</sup> (34 MBq) afforded **2b** in 63% RCY.

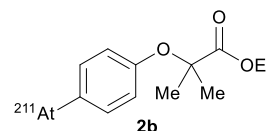

**Radio-TLC chromatography**

Development solvent: hexane/ethyl acetate = 8:1

Retention factor of the corresponding non-radioactive I-labeled compound: 0.45

Retention factor of <sup>211</sup>At-labeled **2b**: 0.50

**Radio-HPLC chromatography**

Eluent: 40% H<sub>2</sub>O (0.1% HCOOH)/60% MeCN

Retention time of the corresponding non-radioactive I-labeled compound: 13.8-15.2 min

Retention time of radioactive <sup>211</sup>At-labeled **2b**: 12.2-13.6 min



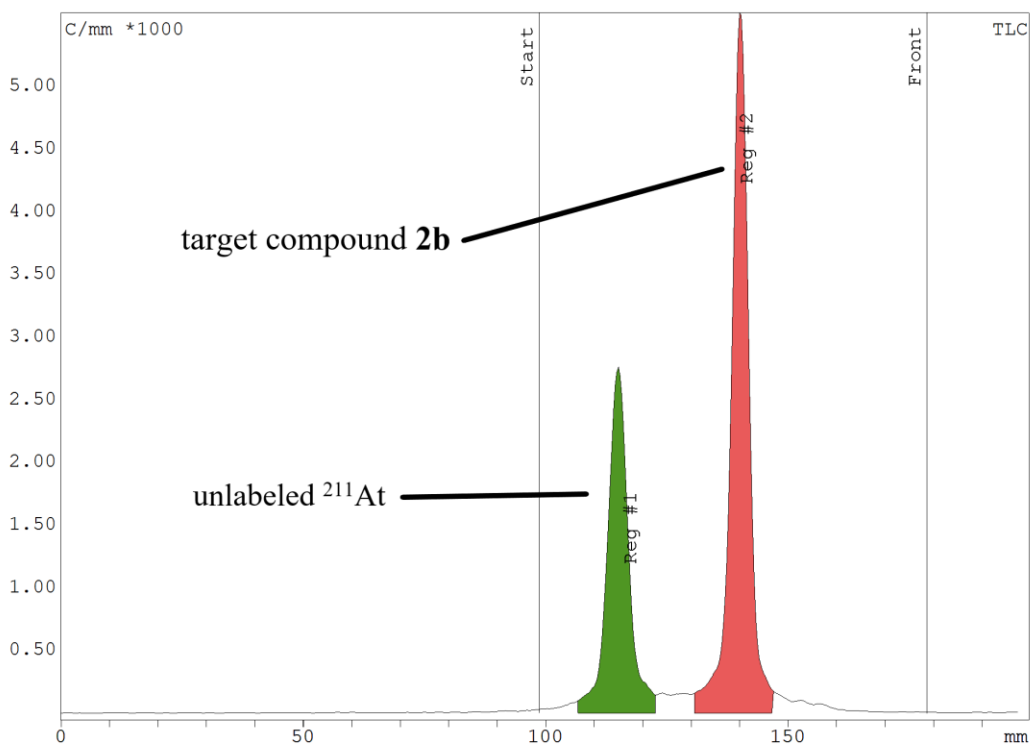

Measurement: 20200128-06-clofibrate.rta, started: 2020/01/28 20:42  
 Method: Hokudai  
 Origin: 100 mm Front 180 mm  
 Meas. time: 1.0 min Resolution: 0.3 mm  
 High voltage: 1626.0 V  
 Radio detector: Serial Nr.: 0

| TLC        |       |        |      |          |       |
|------------|-------|--------|------|----------|-------|
| Substance  | R/F   | %Total | Type | Area     | %Area |
|            |       | %      |      | Counts   | %     |
| Reg #1     | 0.188 | 33.40  | DD   | 13884.00 | 36.81 |
| Reg #2     | 0.500 | 57.34  | DD   | 23832.00 | 63.19 |
| Sum in ROI |       |        |      | 37716.00 |       |
| Total area |       |        |      | 41566.00 |       |
| Area RF    |       |        |      | 41032.00 |       |

**Figure S3.** The result of radio-TLC analysis in the crude mixture of **2b**

**methyl (S)-3-[<sup>211</sup>At](4-astatophenyl)-2-((tert-butoxycarbonyl)amino)propanoate (2c)**

According to the general procedure, the reaction of methyl (S)-2-((tert-butoxycarbonyl)amino)-3-(4-((7,9-dioxo-6,10-dioxaspiro[4.5]decan-8-ylidene)-λ<sup>3</sup>-iodanyl)phenyl)propanoate **1c** with <sup>211</sup>At<sup>-</sup> (16 MBq) afforded **2c** in 69% RCY.

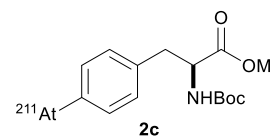

**Radio-TLC chromatography**

Development solvent: hexane/ethyl acetate = 3:1

Retention factor of the corresponding non-radioactive I-labeled compound: 0.33

Retention factor of <sup>211</sup>At-labeled **2c**: 0.45

The trace amount of the least polar material (R<sub>f</sub> = 0.73 highlighted in blue) is an unidentified byproduct.

**Radio-HPLC chromatography**

Eluent: 45% H<sub>2</sub>O (0.1% HCOOH)/55% MeCN

Retention time of the corresponding non-radioactive I-labeled compound: 14.8-16.2 min

Retention time of radioactive <sup>211</sup>At-labeled **2c**: 11.6-12.8 min

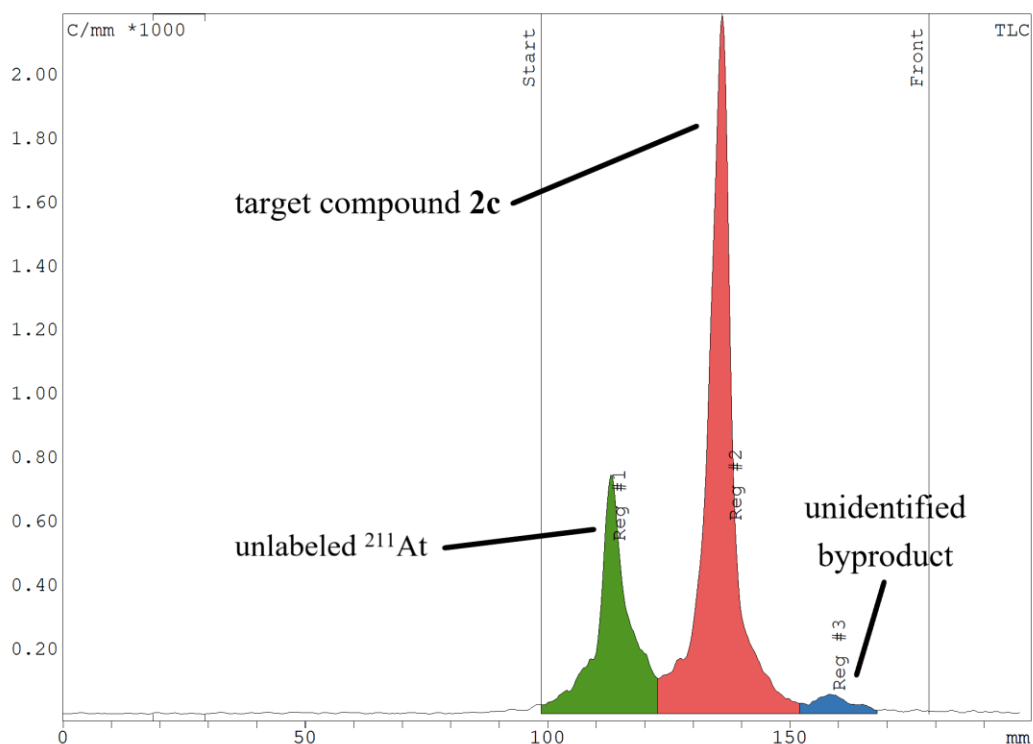

Measurement: 20190829entry5-phe.rta, started: 2019/08/29 20:14  
 Method: Hokudai from: 2000/01/01  
 Origin: 100 mm Front 180 mm  
 Meas. time: 1.0 min Resolution: 0.3 mm  
 Radio detector: raytest Ramona-92 Serial Nr.: 0

| TLC             |       |        |      |          |       |
|-----------------|-------|--------|------|----------|-------|
| Substance       | R/F   | %Total | Type | Area     | %Area |
|                 |       | %      |      | Counts   | %     |
| Reg #1          | 0.167 | 26.74  | DD   | 5398.22  | 27.84 |
| Reg #2          | 0.450 | 66.62  | DD   | 13446.22 | 69.34 |
| Reg #3          | 0.733 | 2.71   | DD   | 547.30   | 2.82  |
| Sum in ROI      |       |        |      | 19391.74 |       |
| Total area      |       |        |      | 20184.41 |       |
| Area RF         |       |        |      | 19648.00 |       |
| BKG1            |       |        |      | 1.444    |       |
| Remainder RF    |       |        |      | 256.26   | 1.30  |
| Remainder (Tot) |       |        |      | 792.67   | 3.93  |

**Figure S4.** The result of radio-TLC analysis in the crude mixture of **2c**

**2-[<sup>211</sup>At](4-(4-astatophenyl)-4-oxobutyl)isoindoline-1,3-dione (2d)**

According to the general procedure, the reaction of 2-(4-(4-((7,9-dioxo-6,10-dioxaspiro[4.5]decan-8-ylidene)-λ<sup>3</sup>-iodanyl)phenyl)-4-oxobutyl)isoindoline-1,3-dione **1d** with <sup>211</sup>At<sup>-</sup> (16 MBq) afforded **2d** in over 99.5% RCY.

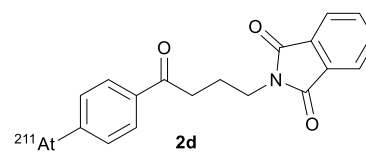

Radio-TLC chromatography

Development solvent: hexane/ethyl acetate = 3:1

Retention factor of the corresponding non-radioactive I-labeled compound: 0.25

Retention factor of <sup>211</sup>At-labeled **2d**: 0.32

Radio-HPLC chromatography

Eluent: 45% H<sub>2</sub>O (0.1% HCOOH)/55% MeCN

Retention time of the corresponding non-radioactive I-labeled compound: 13.5-14.7 min

Retention time of radioactive <sup>211</sup>At-labeled **2d**: 7.6-13.0 min

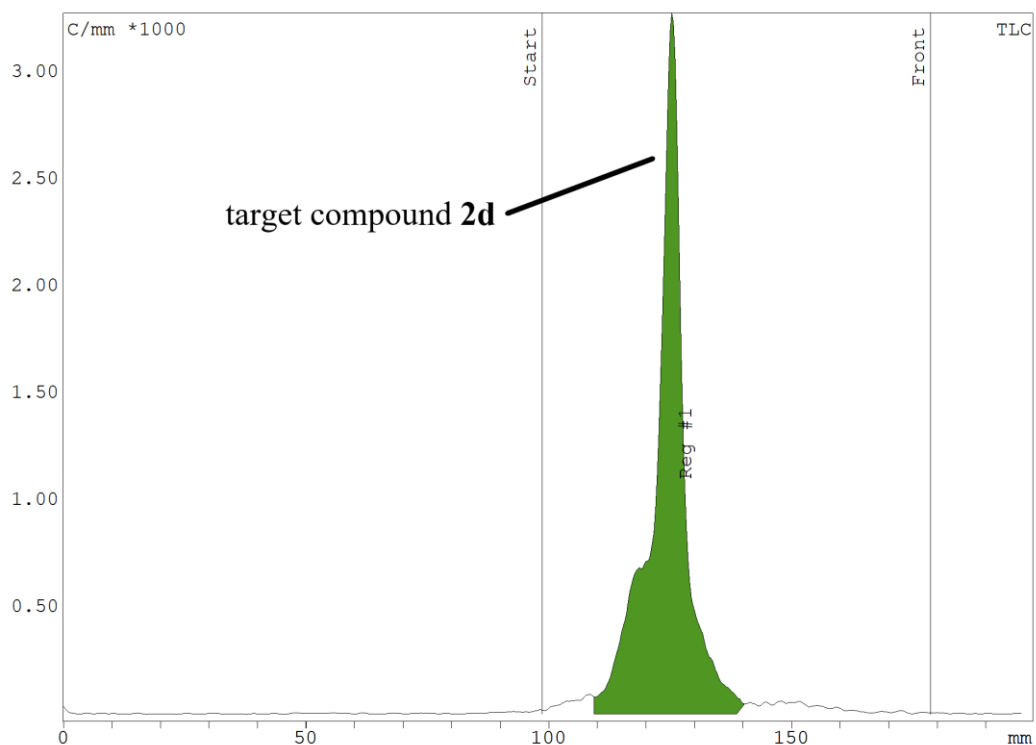

Measurement: 20190829entry4-butyro.rta, started: 2019/08/29 20:18  
 Method: Hokudai from: 2000/01/01  
 Origin: 100 mm Front 180 mm  
 Meas. time: 1.0 min Resolution: 0.3 mm  
 Radio detector: raytest Ramona-92 Serial Nr.: 0

| TLC        |       |        |      |          |        |
|------------|-------|--------|------|----------|--------|
| Substance  | R/F   | %Total | Type | Area     | %Area  |
|            |       | %      |      | Counts   | %      |
| Reg #1     | 0.317 | 90.96  | DD   | 22275.00 | 100.00 |
| Sum in ROI |       |        |      | 22275.00 |        |
| Total area |       |        |      | 24490.00 |        |
| Area RF    |       |        |      | 24012.00 |        |

**Figure S5.** The result of radio-TLC analysis in the crude mixture of **2d**

### 5-[<sup>211</sup>At]astato-3-methylbenzo[d]isoxazole (**2e**)

According to the general procedure, the reaction of 8-((3-methylbenzo[d]isoxazol-5-yl)-λ<sup>3</sup>-iodanylidene)-6,10-dioxaspiro[4.5]decane-7,9-dione **1e** with <sup>211</sup>At<sup>-</sup> (28 MBq) afforded **2e** in 92% RCY.

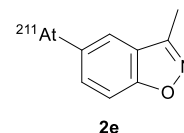

#### Radio-TLC chromatography

Development solvent: hexane/ethyl acetate = 8:1

Retention factor of the corresponding non-radioactive I-labeled compound: 0.42

Retention factor of <sup>211</sup>At-labeled **2e**: 0.45

#### Radio-HPLC chromatography

Eluent: 55% H<sub>2</sub>O (0.1% HCOOH)/45% MeCN

Retention time of the corresponding non-radioactive I-labeled compound: 16.4-17.8 min

Retention time of radioactive <sup>211</sup>At-labeled **2e**: 14.8-16.6 min

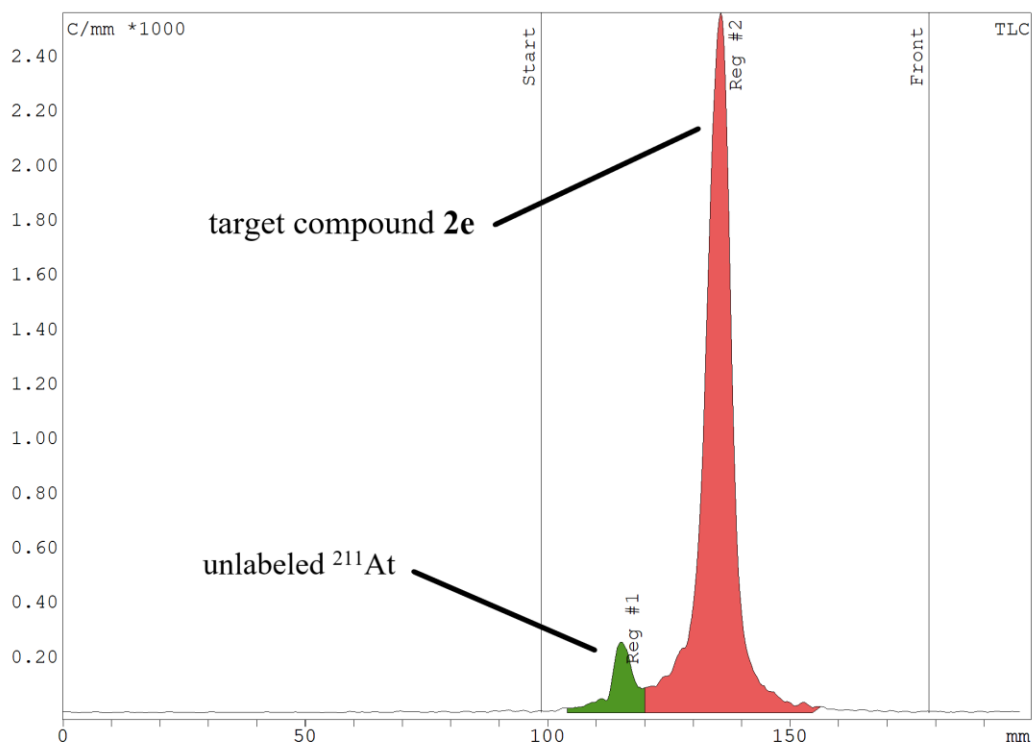

Measurement: 20200128-07-risperidone.rta, started:2020/01/28 22:11  
 Method: Hokudai from: 2000/01/01  
 Origin: 100 mm Front 180 mm  
 Meas. time: 1.0 min Resolution: 0.3 mm  
 Radio detector: raytest Ramona-92 Serial Nr.: 0

| TLC        |       |        |      |          |       |
|------------|-------|--------|------|----------|-------|
| Substance  | R/F   | %Total | Type | Area     | %Area |
|            |       | %      |      | Counts   | %     |
| Reg #1     | 0.188 | 8.14   | DD   | 1600.00  | 8.35  |
| Reg #2     | 0.446 | 89.37  | DD   | 17564.00 | 91.65 |
| Sum in ROI |       |        |      | 19164.00 |       |
| Total area |       |        |      | 19653.00 |       |
| Area RF    |       |        |      | 19395.00 |       |

**Figure S6.** The result of radio-TLC analysis in the crude mixture of **2e**

### 6-[<sup>211</sup>At]astatoquinoline (**2f**)

According to the general procedure, the reaction of 8-(quinolin-6-yl- $\lambda^3$ -iodanylidene)-6,10-dioxaspiro[4.5]decane-7,9-dione **1f** with <sup>211</sup>At<sup>-</sup> (24 MBq) afforded **2f** in over 99.5% RCY.

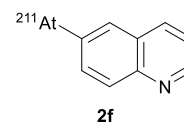

#### Radio-TLC chromatography

Development solvent: hexane/ethyl acetate = 1:1

Retention factor of the corresponding non-radioactive I-labeled compound: 0.38

Retention factor of <sup>211</sup>At-labeled **2f**: 0.50

#### Radio-HPLC chromatography

Eluent: 70% H<sub>2</sub>O (0.1% HCOOH)/30% MeCN

Retention time of the corresponding non-radioactive I-labeled compound: 11.0-13.0 min

Retention time of radioactive <sup>211</sup>At-labeled **2f**: 6.8-7.8 min

Different basicity of nitrogen atom on iodinated or astatinated quinolines might affect their retention time in the acidic eluent.



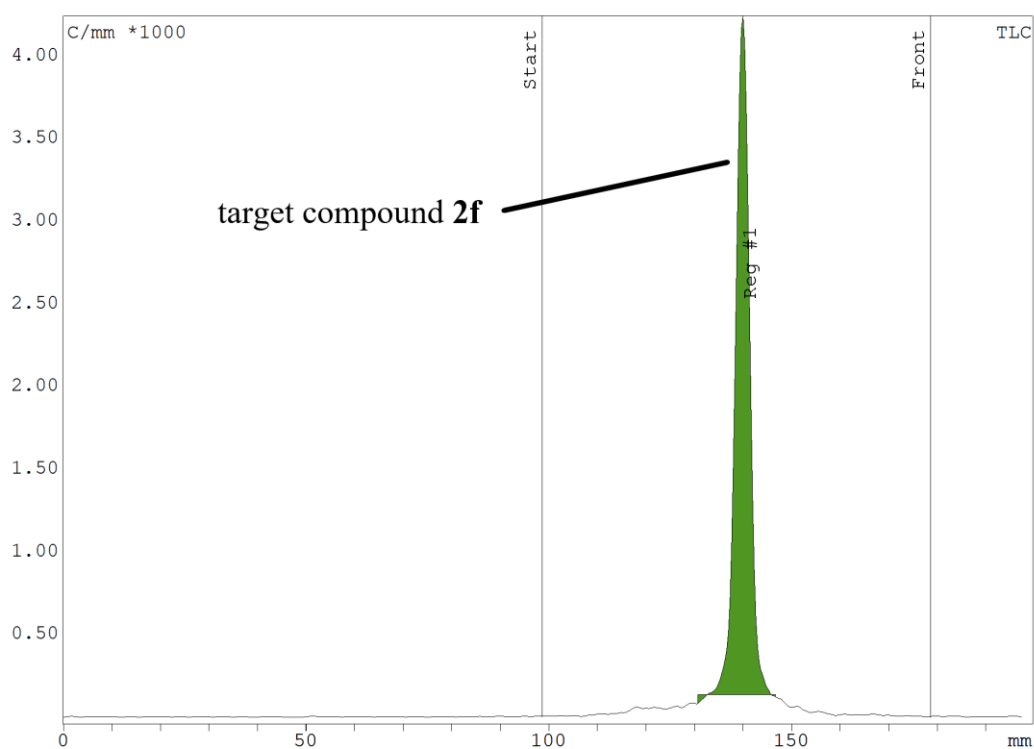

Measurement: 20200128-01-quinoline.rta, started: 2020/01/28 15:34  
Method: Hokudai  
Origin: 100 mm Front 180 mm  
Meas. time: 1.0 min Resolution: 0.3 mm  
High voltage: 1626.0 V  
Radio detector: Serial Nr.: 0

| TLC        |       |        |      |          |        |
|------------|-------|--------|------|----------|--------|
| Substance  | R/F   | %Total | Type | Area     | %Area  |
|            |       |        |      | Counts   | %      |
| Reg #1     | 0.500 | 76.86  | BB   | 13901.39 | 100.00 |
| Sum in ROI |       |        |      | 13901.39 |        |
| Total area |       |        |      | 18086.00 |        |
| Area RF    |       |        |      | 17889.00 |        |

**Figure S7.** The result of radio-TLC analysis in the crude mixture of **2f**

### 5-[<sup>211</sup>At]astatobenzo[b]thiophene (**2g**)

According to the general procedure, the reaction of 8-(benzo[b]thiophen-5-yl)- $\lambda^3$ -iodanylidene)-6,10-dioxaspiro[4.5]decane-7,9-dione **1g** with <sup>211</sup>At<sup>-</sup> (31 MBq) afforded **2g** in 93% RCY.

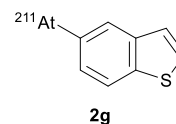

#### Radio-TLC chromatography

Development solvent: hexane

Retention factor of the corresponding non-radioactive I-labeled compound: 0.51

Retention factor of <sup>211</sup>At-labeled **2g**: 0.43

#### Radio-HPLC chromatography

Eluent: 40% H<sub>2</sub>O (0.1% HCOOH)/60% MeCN

Retention time of the corresponding non-radioactive I-labeled compound: 13.4-14.6 min

Retention time of radioactive <sup>211</sup>At-labeled **2g**: 14.2-16.0 min

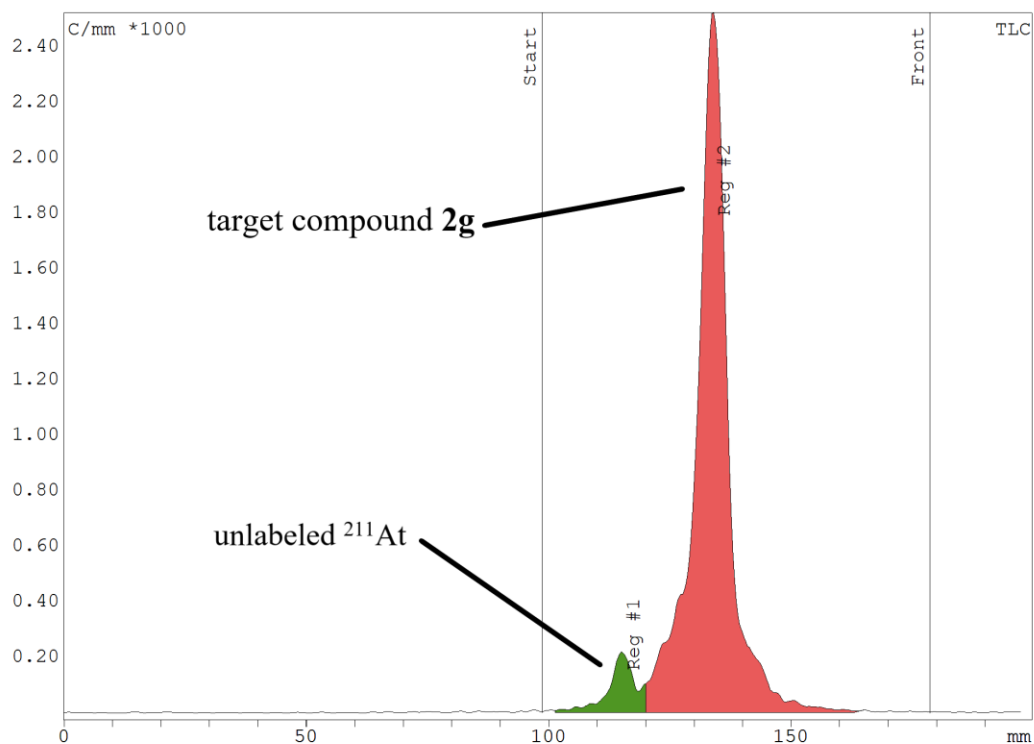

Measurement: 20200128-05-benzothiophen.rta, started: 2020/01/28 19:  
 Method: Hokudai from: 2000/01/01  
 Origin: 100 mm Front 180 mm  
 Meas. time: 1.0 min Resolution: 0.3 mm  
 Radio detector: raytest Ramona-92 Serial Nr.: 0

| TLC        |       |        |      |          |       |
|------------|-------|--------|------|----------|-------|
| Substance  | R/F   | %Total | Type | Area     | %Area |
|            |       | %      |      | Counts   | %     |
| Reg #1     | 0.188 | 6.49   | DD   | 1376.00  | 6.59  |
| Reg #2     | 0.425 | 92.04  | DD   | 19503.00 | 93.41 |
| Sum in ROI |       |        |      | 20879.00 |       |
| Total area |       |        |      | 21189.00 |       |
| Area RF    |       |        |      | 20961.00 |       |

**Figure S8.** The result of radio-TLC analysis in the crude mixture of **2g**

#### 4. $^{211}\text{At}$ -astatination of indolyliodonium ylide

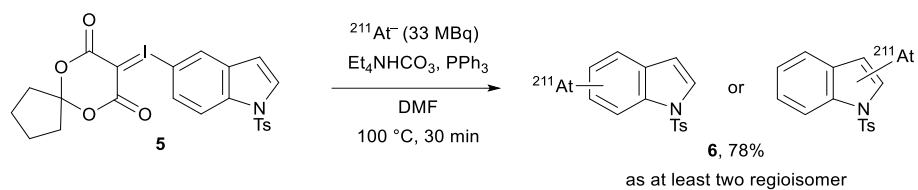

According to the general procedure, 8-((1-tosyl-1*H*-indol-5-yl)- $\lambda^3$ -iodanylidene)-6,10-dioxaspiro[4.5]decane-7,9-dione **5** was reacted with  $^{211}\text{At}^-$  (33 MBq),  $\text{Et}_4\text{NHCO}_3$ , and  $\text{PPh}_3$  in DMF at 100 °C for 30 min. The reaction mixture was analysed by radio-TLC, and the result is shown in below (Figure S9).

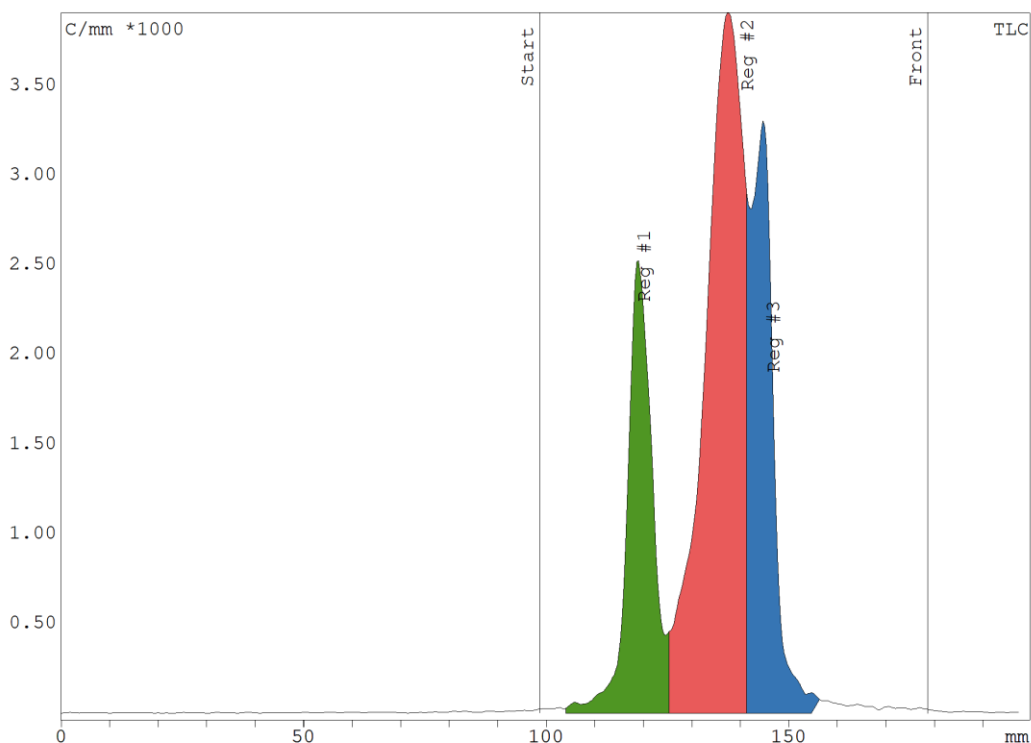

Measurement: 20200128-02-Ts-indole-2nd.rta, started: 2020/01/28 16:  
 Method: Hokudai from: 2000/01/01  
 Origin: 100 mm Front 180 mm  
 Meas. time: 1.0 min Resolution: 0.3 mm  
 Radio detector: raytest Ramona-92 Serial Nr.: 0

| TLC        |       |        |      |          |       |
|------------|-------|--------|------|----------|-------|
| Substance  | R/F   | %Total | Type | Area     | %Area |
|            |       | %      |      | Counts   | %     |
| Reg #1     | 0.238 | 21.88  | DD   | 15541.00 | 22.37 |
| Reg #2     | 0.471 | 58.22  | DD   | 41358.00 | 59.54 |
| Reg #3     | 0.558 | 17.68  | DD   | 12560.00 | 18.08 |
| Sum in ROI |       |        |      | 69459.00 |       |
| Total area |       |        |      | 71041.00 |       |
| Area RF    |       |        |      | 70485.00 |       |

**Figure S9.** The result of radio-TLC analysis in the reaction of **5** with  $^{211}\text{At}^-$

Development solvent: hexane/ethyl acetate = 8:1 (developed twice)

Retention factor of the corresponding non-radioactive I-labeled compound: 0.42

On the TLC plate, different three peaks were observed as the major materials (Rf = 0.24, 0.47, 0.56). The most polar material (Rf = 0.24 highlighted in green) would be unlabeled  $^{211}\text{At}^-$ . The others with similar polarity (Rf = 0.47 highlighted in red, and Rf = 0.56 highlighted in blue) were positioned near the corresponding non-

radioactive *N*-Ts-5- $^{127}\text{I}$ iodoindole ( $R_f = 0.42$ ). These results indicated that these two radioactive materials would be regioisomers of  $^{211}\text{At}$ -labeled indole **6**. We propose the following three pathways to afford the regioisomers **6**. First, nucleophilic aromatic substitution reaction of **5** would proceed to afford 5- $^{211}\text{At}$ astatoindole (**C5-6**) (Scheme S1a). As a second pathway, the aryne formation would initially occur, and then  $^{211}\text{At}^-$  attacked the aryne to afford C-4 or C-6 labeled compounds (**C4-** or **C6-6**) (Scheme S1b). The formation of aryne from arylidonium ylide has also been reported in a radiofluorination reaction.<sup>[6]</sup> In this report, an electron-rich arene is more likely to form the aryne and converted to the mixture of  $^{18}\text{F}$ -labeled regioisomers. As the other pathway, an electrophilic aromatic substitution reaction at C-2 or C-3 position of indole **5** with  $^{211}\text{At}^+$  and decomposition of iodonium ylide might proceed to afford  $^{211}\text{At}$ -labeled compounds (**C2-** or **C3-6**) (Scheme S1c). Although the reaction was performed under reducing conditions, the possibility that  $^{211}\text{At}^-$  was oxidized to  $^{211}\text{At}^+$  cannot be fully excluded.

**Scheme S1.** Plausible pathways to afford regioisomers **6**

**(a) Nucleophilic aromatic substitution reaction**

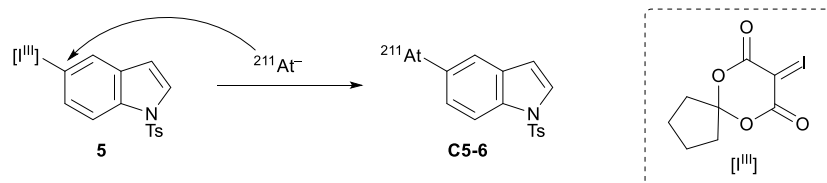

**(b) Aryne formation/Nucleophilic aromatic substitution reaction**

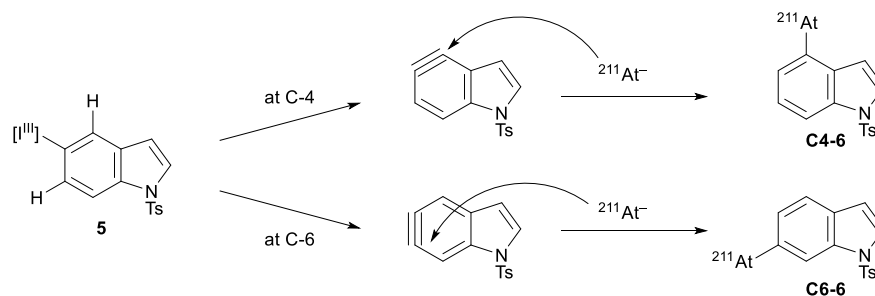

**(c) Electrophilic aromatic substitution reaction**

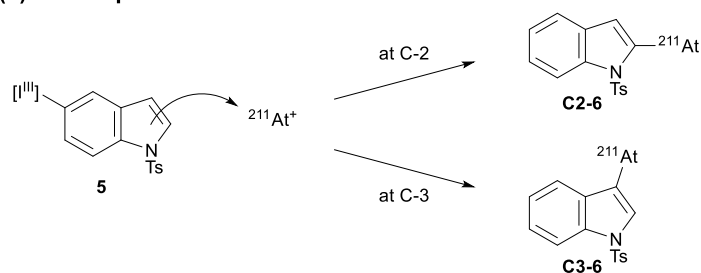

## 5. $^{211}\text{At}$ -astatination of benzofuryliodonium ylide

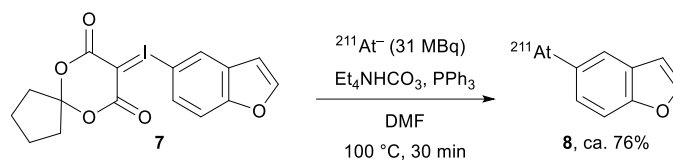

According to the general procedure, 8-(benzofuran-5-yl- $\lambda^3$ -iodanylidene)-6,10-dioxaspiro[4.5]decane-7,9-dione **7** was reacted with  $^{211}\text{At}^-$  (31 MBq),  $\text{Et}_4\text{NHCO}_3$ , and  $\text{PPh}_3$  in DMF at  $100\text{ }^\circ\text{C}$  for 30 min. The reaction mixture was analyzed by radio-TLC and radio-HPLC. These results are shown in below (Figure S10, 11).

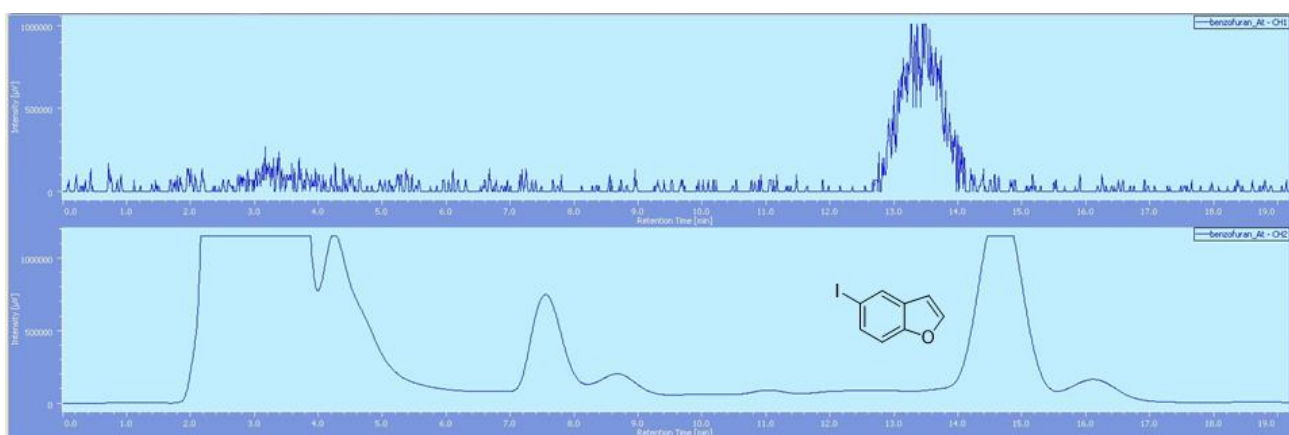

**Figure S10.** Radio-HPLC (top) and UV-HPLC (bottom) chromatogram of the reaction mixture of **7** with  $^{211}\text{At}^-$   
Eluent: 45%  $\text{H}_2\text{O}$  (0.1%  $\text{HCOOH}$ )/55% MeCN

Retention time of the corresponding non-radioactive I-labeled compound: 13.8-15.6 min

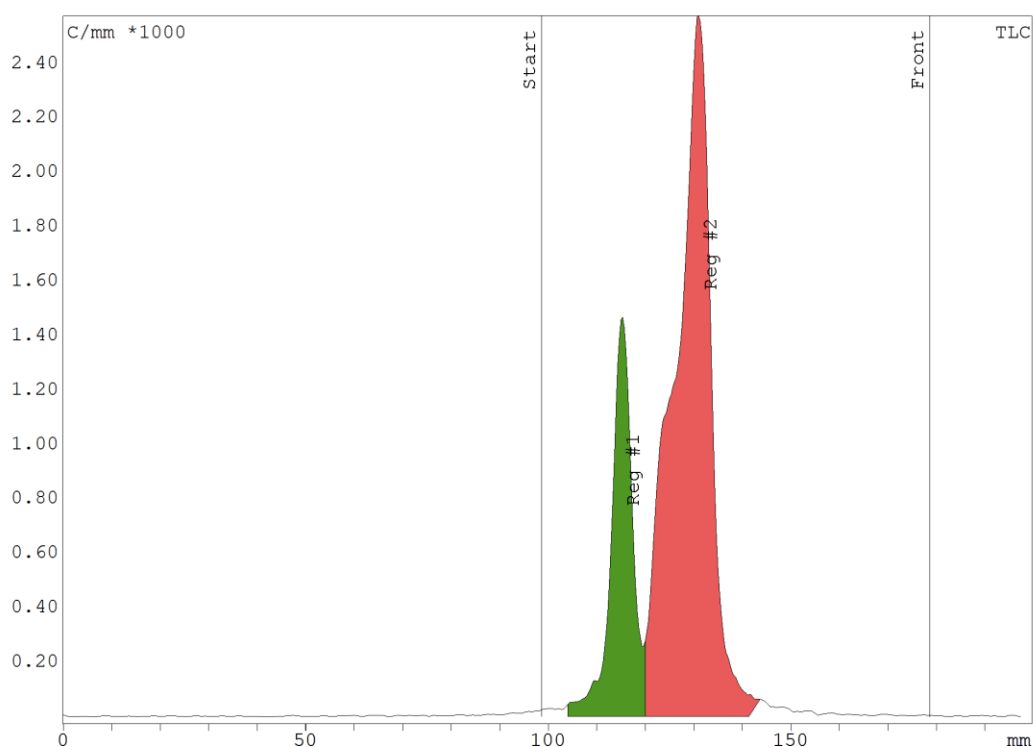

Measurement: 20200128-04-benzofuran.rta, started: 2020/01/28 18:15  
 Method: Hokudai  
 Origin: 100 mm Front 180 mm  
 Meas. time: 1.0 min Resolution: 0.3 mm  
 High voltage: 1626.0 V  
 Radio detector: Serial Nr.: 0

| TLC        |       |        |      |          |       |
|------------|-------|--------|------|----------|-------|
| Substance  | R/F   | %Total | Type | Area     | %Area |
|            |       | %      |      | Counts   | %     |
| Reg #1     | 0.192 | 23.45  | DD   | 7280.00  | 24.39 |
| Reg #2     | 0.388 | 72.69  | DD   | 22570.00 | 75.61 |
| Sum in ROI |       |        |      | 29850.00 |       |
| Total area |       |        |      | 31049.00 |       |
| Area RF    |       |        |      | 30610.00 |       |

**Figure S11.** The result of radio-TLC analysis in the reaction of **7** with  $^{211}\text{At}^-$

Development solvent: hexane

Retention factor of corresponding non-radioactive I-labeled compound: 0.46

On the TLC plate, two peaks were observed as major materials ( $R_f = 0.19, 0.39$ ). The more polar material ( $R_f = 0.19$  highlighted in green) would be unlabeled  $^{211}\text{At}^-$ . Although peak tailing occurred, the other ( $R_f = 0.39$  highlighted in red) was close to the corresponding non-radioactive 5- $^{127}\text{I}$ iodobenzofuran ( $R_f = 0.46$ ). In the HPLC chromatogram, the radiation peak (retention time: 12.8-14.2 min) was also observed close to the UV



peak of the I-labeled standard. These analyses ensure that the reaction of **7** with  $^{211}\text{At}^-$  afforded  $^{211}\text{At}$ -labeled benzofuran **8** in ca. 76% RCY.

To examine the identity of peak tailing on the radio-TLC analysis, we developed the same TLC plate again, and the resulting image of radio-TLC analysis is shown in below (Figure S12).

Measurement 20200128-04-benzofuran-2nd.rt raytest GmbH Page 1/1  
 C:\GINA\_NT\HOKUDAI\re20200128-04-BENZOFURAN-2ND.RTA Print date: 2020/11/26

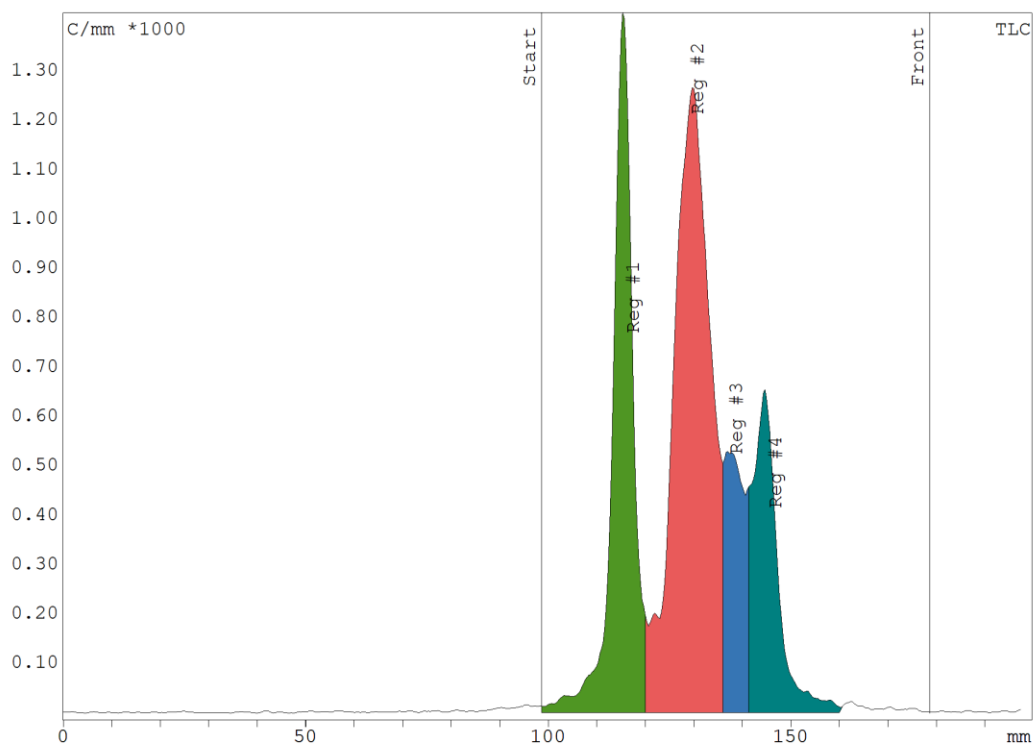

Measurement: 20200128-04-benzofuran-2nd.rt, started: 2020/01/28 18:  
 Method: Hokudai from: 2000/01/01  
 Origin: 100 mm Front 180 mm  
 Meas. time: 1.0 min Resolution: 0.3 mm  
 Radio detector: raytest Ramona-92 Serial Nr.: 0

| TLC        |       |        |      |          |       |
|------------|-------|--------|------|----------|-------|
| Substance  | R/F   | %Total | Type | Area     | %Area |
|            |       |        |      | Counts   | %     |
| Reg #1     | 0.192 | 27.62  | DD   | 6908.00  | 28.21 |
| Reg #2     | 0.371 | 45.22  | DD   | 11310.00 | 46.19 |
| Reg #3     | 0.467 | 9.23   | DD   | 2309.00  | 9.43  |
| Reg #4     | 0.558 | 15.82  | DD   | 3957.00  | 16.16 |
| Sum in ROI |       |        |      | 24484.00 |       |
| Total area |       |        |      | 25010.00 |       |
| Area RF    |       |        |      | 24674.00 |       |

**Figure S12.** The result of radio-TLC analysis in the reaction of **7** with  $^{211}\text{At}^-$  (developed twice)  
 Development solvent: hexane (developed twice)

In the first TLC, the peak tailing was observed ( $R_f = 0.39$  highlighted in red), which suggested that the less polar peak was the major product and the more polar peak was the minor product (**Figure S11**). However, in the second TLC, in which several radiation peaks were observed, the less polar peaks were minor products ( $R_f = 0.47$  highlighted in red, and  $R_f = 0.56$  highlighted in dark green) and the more polar peak was the major product ( $R_f = 0.37$  highlighted in red) (**Figure S12**). If the peak tailing in the first TLC had been due to only the overlapped peaks, the less polar peak would have become the major product and the more polar peak would have become the minor product in the second TLC. These results indicate that the behavior of the compounds were different in the first and second development on the TLC plate. We consider that the less polar  $^{211}\text{At}$ -labeled benzofuran **8** would be unstable on the silica gel and decomposed into the more polar compounds on the TLC plate.

## 6. Supplementary references

- [1] N. Komami, K. Matsuoka, A. Nakano, M. Kojima, T. Yoshino and S. Matsunaga, *Chem.-Eur. J.*, 2019, **25**, 1217–1220.
- [2] K. Matsuoka, N. Komami, M. Kojima, T. Yoshino and S. Matsunaga, *Asian J. Org. Chem.*, 2019, **8**, 1107–1110.
- [3] K. Nagatsu, K. Minegishi, M. Fukada, H. Suzuki, S. Hasegawa and M.-R. Zhang, *Appl. Radiat. Isot.*, 2014, **94**, 363-371.
- [4] T. Furuya, A. E. Strom and T. Ritter, *J. Am. Chem. Soc.*, 2009, **131**, 1662–1663.
- [5] M. Berdal, S. Gouard, R. Eychenne, S. Marionneau-Lambot, M. Croyal, A. Faivre-Chauvet, M. Chérel, J. Gaschet, J.-F. Gestin and F. Guérard, *Chem. Sci.*, 2021, **12**, 1458–1468.
- [6] J. Cardinale, J. Ermert, S. Humpert and H. H. Coenen, *Rsc Adv.*, 2014, **4**, 17293-17299.
